# Supplementary material
Source: Springer Nature journal article supplement (https://www.springermedizin.de/resource/supplementary/12985_2010_1027_MOESM2_ESM.pdf/9608980)

**1****2****3****4****5****6****7**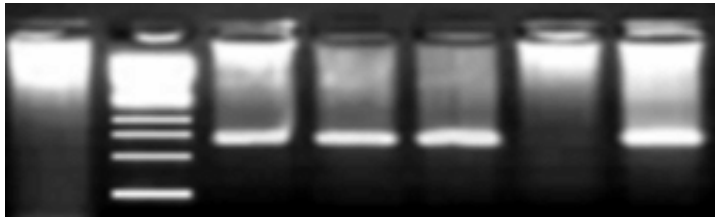

Supplement: MOESM2 [file 9608980]
